# Supplementary material for: Distinct partitioning of ALS associated TDP-43, FUS and SOD1 mutants into cellular inclusions
Source: PubMed Central journal article supplement (PMC4544019; doi:10.1038/srep13416), 2015-08-21
Supplement: srep13416-s1.pdf [file srep13416-s1.pdf]

## Distinct partitioning of ALS associated TDP-43, FUS and SOD1 mutants into cellular inclusions

Natalie E. Farrowell<sup>1,2</sup>, Isabella A. Lambert-Smith<sup>1,2</sup>, Sadaf T. Warraich<sup>4</sup>, Ian P. Blair<sup>4</sup>, Darren N. Saunders<sup>5,6</sup>, Danny M. Hatters<sup>3</sup>, Justin J. Yerbury<sup>1,2</sup>.

### Supplementary Figures

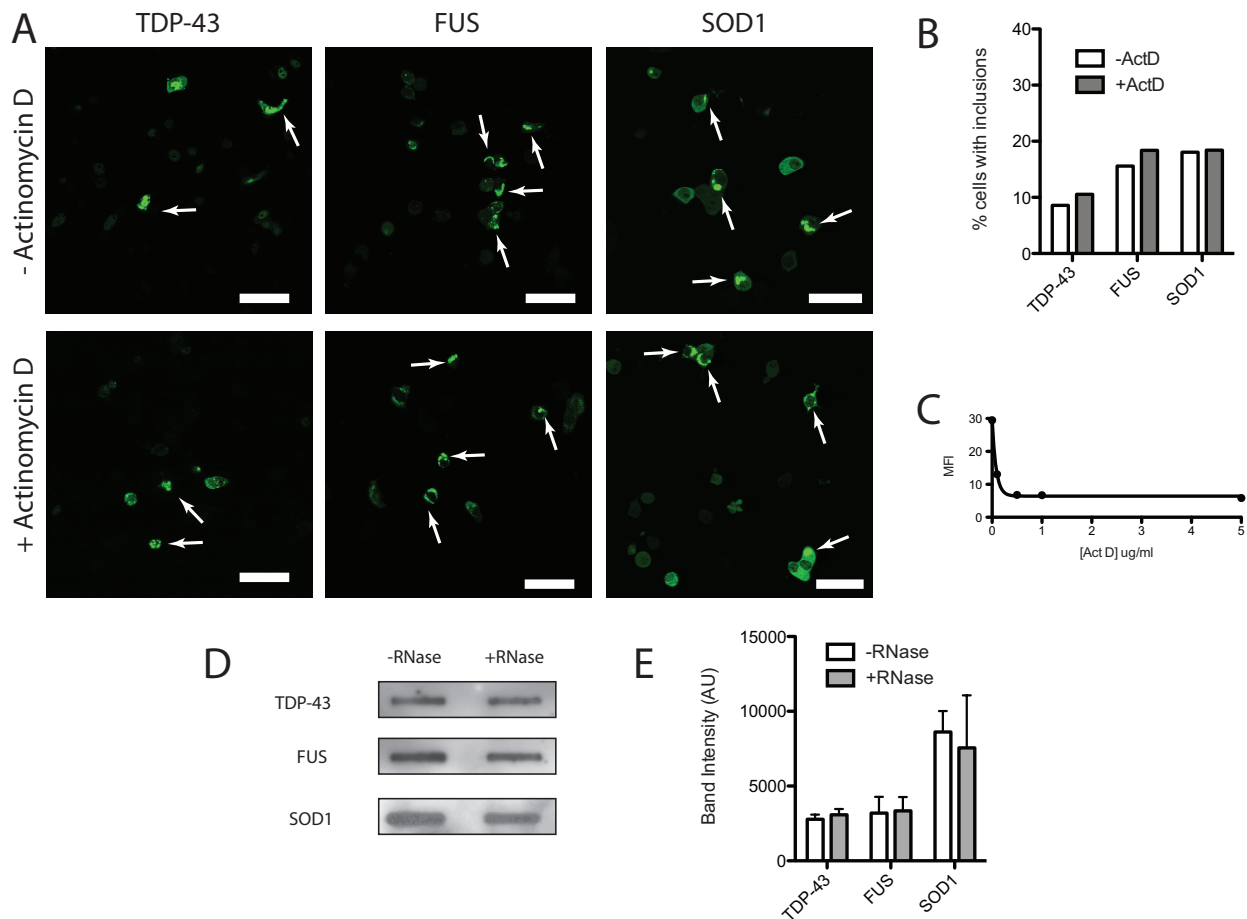

**Fig. S1. Large ALS inclusions are RNA independent.** (A) NSC-34 cells expressing mutant TDP-43, FUS or SOD1-GFP were treated with RNA synthesis inhibitor (5  $\mu$ m actinomycin D) or not 24 h after transfection. Confocal microscopy was used to image cells 48 h after transfection. (B) Number of cells containing inclusions were counted to determine proportion of transfected cells containing large inclusions. (C) We verified that the dosage of actinomycin D completely suppressed RNA synthesis during the 24 h treatment period using a Click-iT RNA synthesis kit. (D) Cell lysates from cells expressing mutant TDP-43, FUS or SOD1-GFP were treated with 2mg/mL RNase and analysed by filter trap assay. RNase treatment did not modify the size of the aggregates.

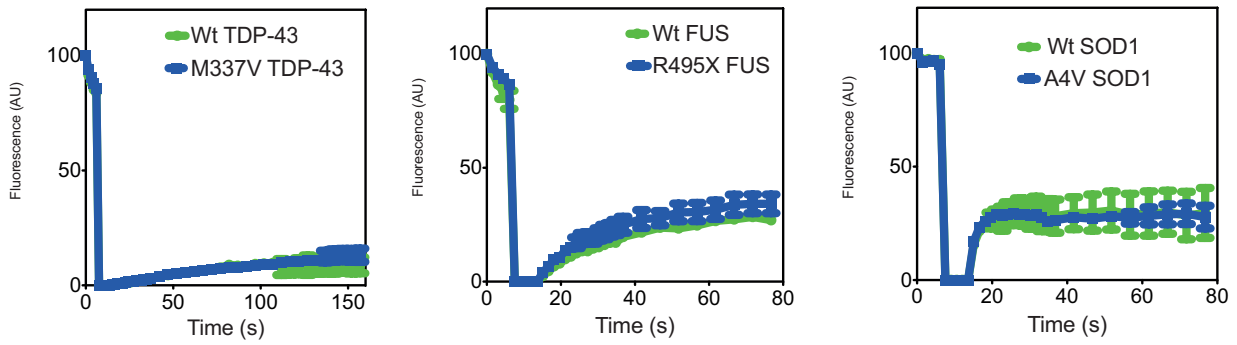

**Fig. S2. FRAP analysis of soluble wt and mutant SOD1, TDP-43 and FUS-GFP tagged proteins.** FRAP analysis of non-aggregated proteins in NSC-34 cells expressing mutant TDP-43, FUS or SOD1-GFP. Mean fluorescence intensity (from within the ROI) plotted over time. Prebleach intensity was recorded, and recovery was recorded for up to 150s. Results are means and standard deviation from n = 10.

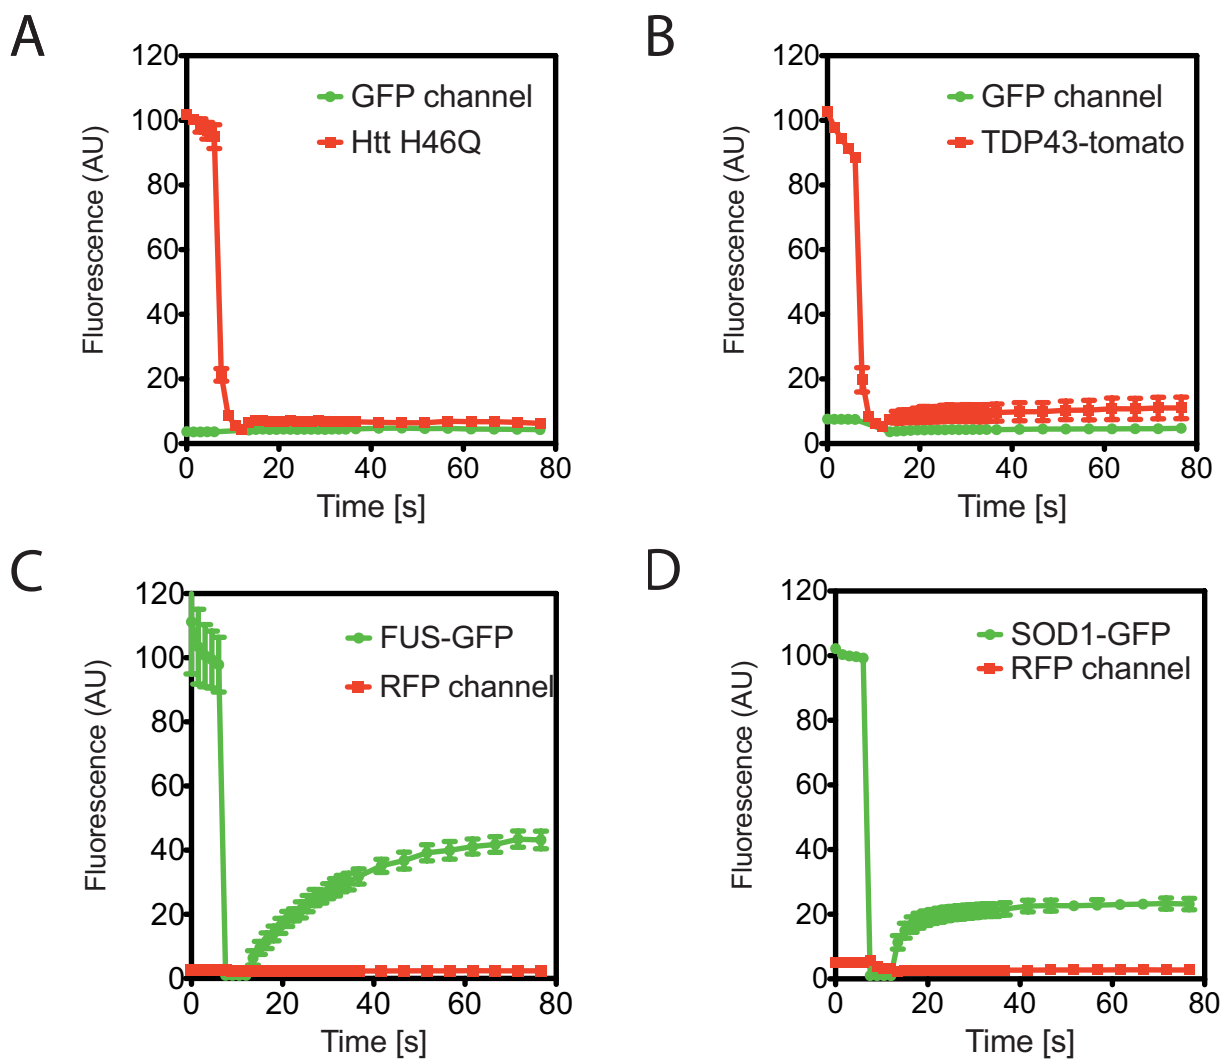

**Fig. S3. FRAP analysis of inclusions containing only Htt, TDP-43, FUS and SOD1.** FRAP analysis of proteins in inclusions in NSC-34 cells co-expressing Httex146Q-mcherry and either mutant TDP-43, FUS or SOD1-GFP. Mean fluorescence intensity (from within the ROI) plotted over time. Prebleach intensity was recorded, and recovery was recorded for up to 150s. Results are means and standard deviation from  $n = 10$ .

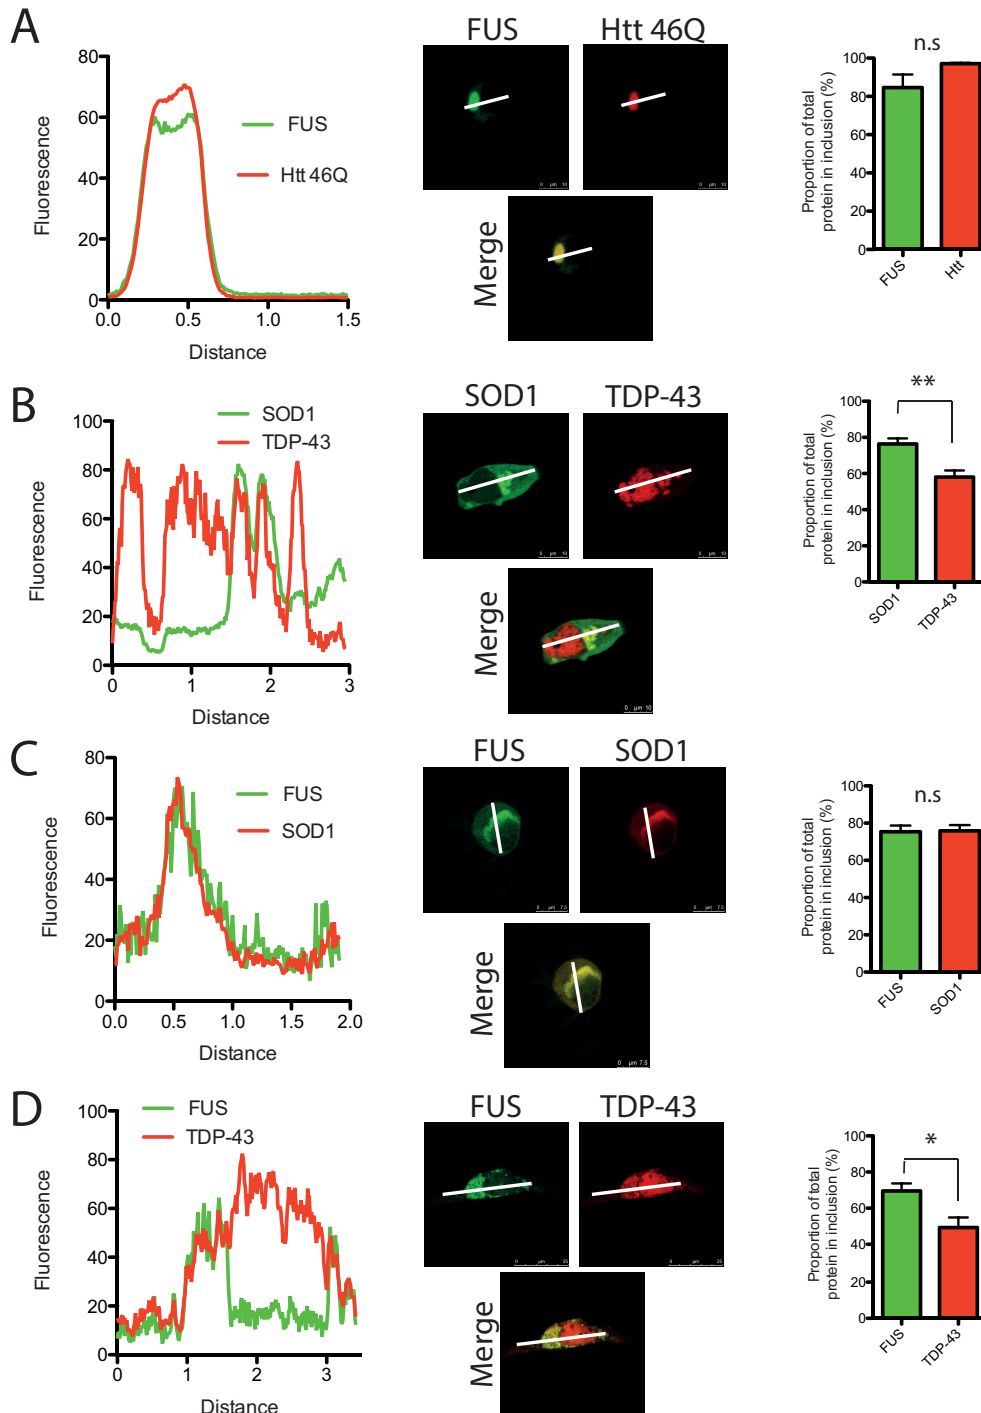

**Fig. S4. Image analysis of inclusions containing combinations of Htt, TDP-43, FUS and SOD1.** NSC-34 cells were contranected with either Httex146Q-mcherry and FUS-GFP (A), SOD1-GFP and TDP-43-tomato (B), FUS-GFP and SOD1-tomato (C), or FUS-GFP and TDP-43-tomato (D). Cells containing inclusions of colocalized fusion proteins were analysed using a region of interest tool in imageJ. The proportion of total fluorescence of each fusion protein that corresponded to inclusions was estimated. Results are means and standard deviation (n=6). \* indicates  $p < 0.05$ , \*\* indicates  $p < 0.01$ .

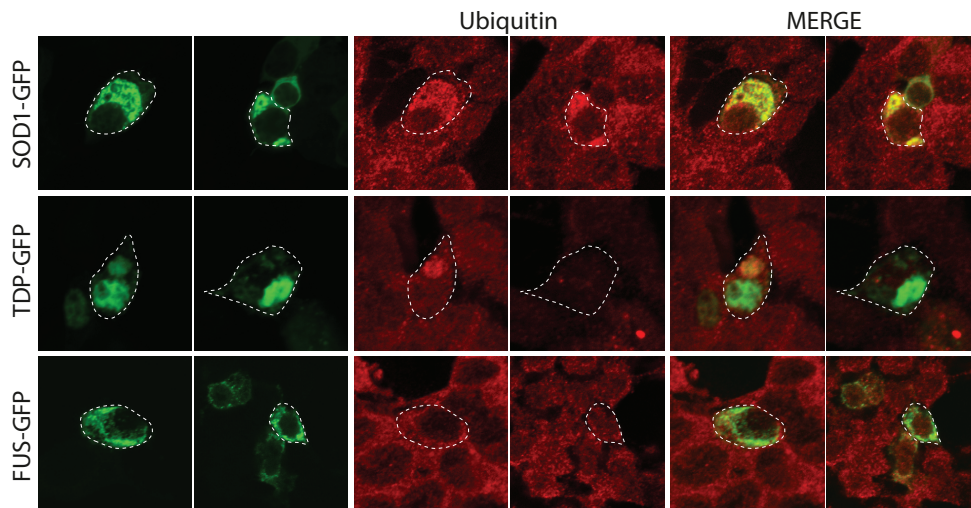

**Fig. S5. Ubiquitin immunostaining confirms few TDP-43 inclusions are ubiquitin positive.**

NSC-34 cells were transiently transfected with mutant TDP-43, FUS and SOD1-GFP fusions and the incubated for 48-72 hours. Cells were then immunostained with antibodies raised against ubiquitin. Images shown are from 72 hours, similar results were found at 48 hours (data not shown).

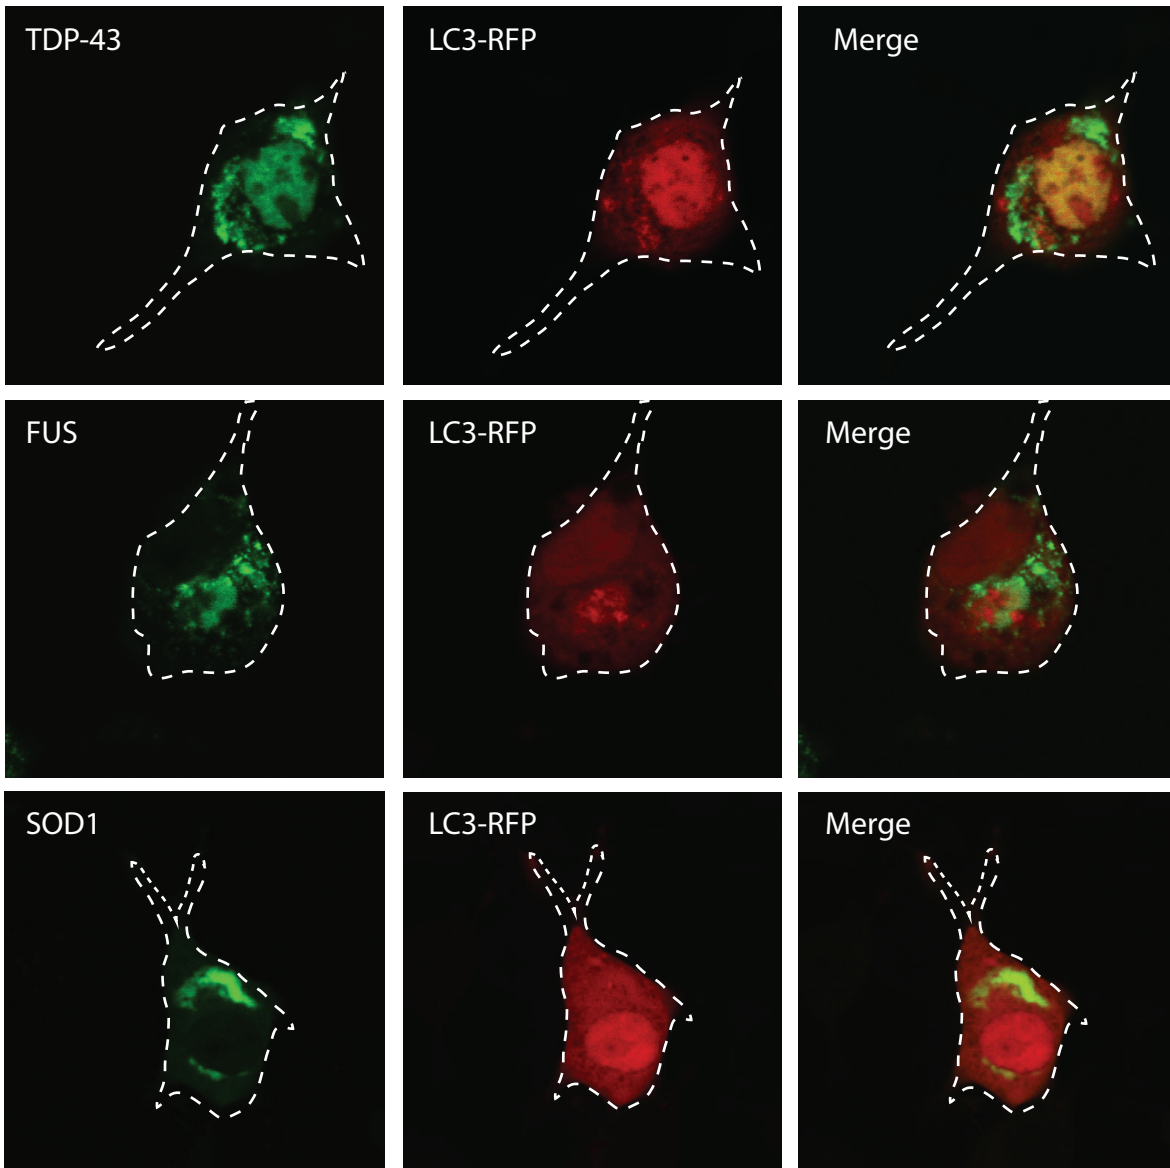

**Fig. S6. TDP-43 and FUS inclusions are adjacent to LC3 foci.** NSC-34 cells were transiently co-transfected with LC3-mcherry and either mutant TDP-43, FUS and SOD1-GFP fusions and then incubated for 48 hours. Cells were then imaged.

## **Supplementary Files**

**1. 3D reconstruction of Htt, TDP-43 and SOD1 Triple transfection.** Z-stacks of NSC-34 cells cotransfected with SOD1-GFP, TDP-43-tomato and Htt-CFP imaged 48 h post transfection. Red dot was used as a counter stain (coloured Blue in this reconstruction). TDP-43 formed inclusions that did not overlap with GFP, CFP or red dot nuclear stain.
